# Supplementary material for: Sense and simplicity in HADDOCK scoring: Lessons from CASP‐CAPRI round 1
Source: PubMed Central journal article supplement — Proteins. 2016 Nov 24;85(3):417–23. doi: 10.1002/prot.25198 (PMC5324763; doi:10.1002/prot.25198), 2016-11-24
Supplement: PROT-85-417-s001.pdf [file PROT-85-417-s001.pdf]

## Supplementary Material

### Sense and Simplicity in HADDOCK Scoring: Lessons from CASP-CAPRI

Vangone A., Rodrigues J.P.G.L.M., Xue L., van Zundert G.C.P., Geng C., Kurkcuoglu Z., Nellen M., Narasimhan S., Karaca E., van Dijk M., Melquiond A.S.J., Visscher K., Trellet M., Kastiris P.L., Bonvin A.M.J.J.\*

**Figure S1.** Scatter plots of overall backbone RMSDs from the top-scored model versus HADDOCK score for the 25 target of the CASP-CAPRI round. The HADDOCK scores have been shifted to positive values and are reported in a log scale. Green check marks and dots in the plots indicate the targets for which HADDOCK selected acceptable or better quality models; all the unsuccessful targets are flagged with a red cross.

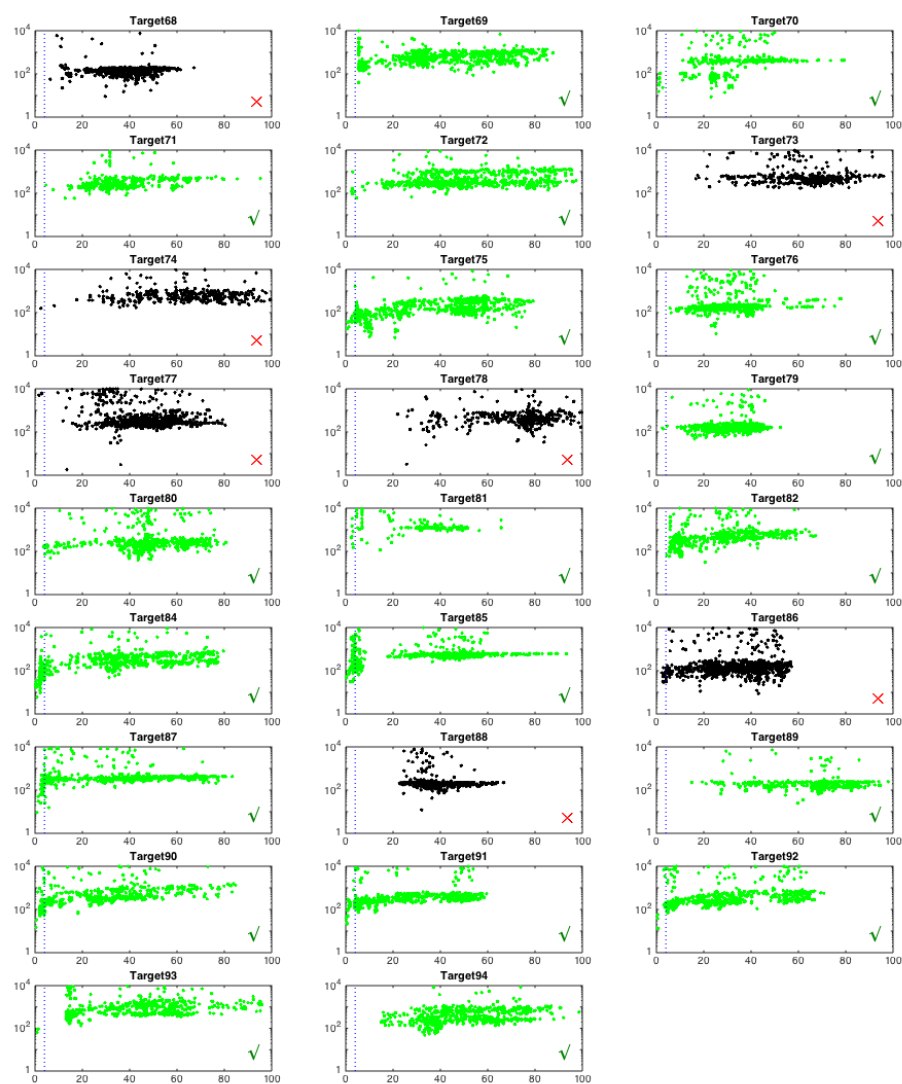

**Figure S2.** Comparison of the i-RMSD of the best model predicted by HADDOCK (dark grey bars) and overall backbone RMSD of the unbound homology model used as input structure for docking (light gray bars) for the unsuccessful (left) and successful (right) HADDOCK predictions. The dashed line indicates the CAPRI 4.0 Å acceptable i-RMSD cut-off. For heterodimers targets (T81 and T89), the backbone-RMSD of the worst model among the two unbound modeled proteins is reported.

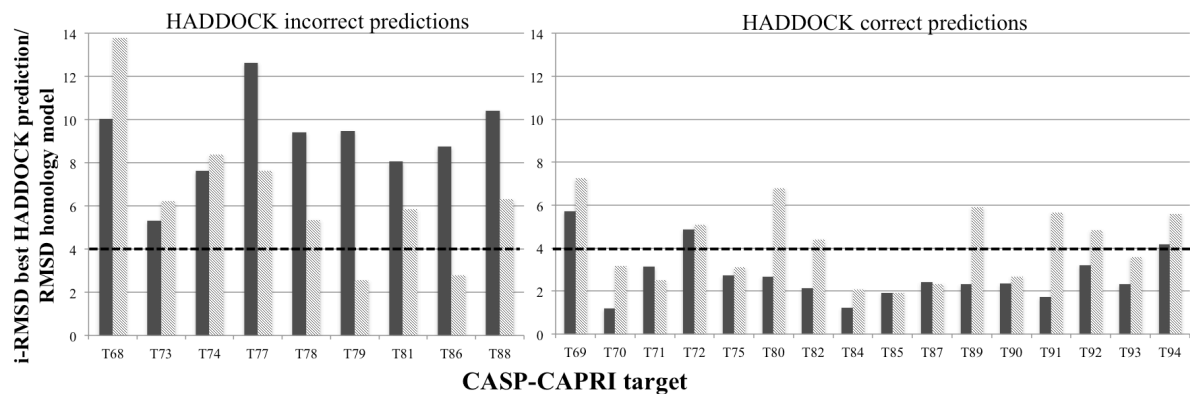

**Table S1. Modeling and prediction approach used by HADDOCK during CASP-CAPRI server prediction**

Most of our predictions started from a model built with either MODELLER (v9.12) [1] using HHpred [2] for template search, or I-TASSER [3], or an ensemble of models generated using both methods. The target/template alignment was optimized, if necessary, either with NEEDLE [4] in case of high sequence identity, or using manually-curated multiple sequence alignments. In one particular case, T77, we created a model of the monomer using a flexible multibody docking approach [5] due to the disposition of the individual domains. Typically, an ensemble of the ten best monomer models was used as starting point for HADDOCK. Since all targets were homo-oligomeric structures, non-crystallography symmetry and regular symmetry restraints were used [5] in combination with center-of-mass restraints (ab initio mode of HADDOCK). In cases where homologous complexes were identified, Ca-Ca distance restraints were applied, derived either manually or determined by PS-HOMPPI [6]. A number of targets were also directly modeled as a multimer in MODELLER and only refined in explicit solvent in HADDOCK. The models for submission were distributed over the clusters ranked by HADDOCK. A summary of the modelling methodology and restraints used is provided in the table.

| Target | ID              |                 |                     |                     |                      |                              |
|--------|-----------------|-----------------|---------------------|---------------------|----------------------|------------------------------|
| CAPRI  | CASP            | Alignment       | Template            | Modelling           | Docking              | Restraints                   |
| T68    | T0759           | HHpred          | 1LM5, 1LM7          | Modeller            | HADDOCK              | Ca-Ca + Symmetry             |
| T69    | T0764           | Hhpred + Needle | 1QLW                | Modeller            | HADDOCK              | Ca-Ca + Symmetry             |
| T70    | T0765           | -               | -                   | I-Tasser            | HADDOCK              | Symmetry + CM                |
| T71    | T0768           | HHpred          | 4GT6, 2Z80          | Modeller            | HADDOCK              | Symmetry + CM                |
| T72    | T0770           | MSAProbs        | 3EJN, 3FDH,<br>3MX3 | Modeller            | HADDOCK              | Symmetry + CM                |
| T73    | T0772           | HHpred          | 3hbk                | Modeller            | HADDOCK              | Symmetry + CM                |
| T74    | T0774           | HHpred          | 4k4k                | Modeller            | HADDOCK              | Symmetry + CM                |
| T75    | T0776           | Hhpred + Needle | 4jhl                | Modeller            | HADDOCK              | Symmetry + AIRs (Homology)   |
| T77    | T0780           | HHpred          | 2kq1                | Modeller + HADDOCK  | HADDOCK              | Symmetry + CM                |
| T78    | T0781           | HHpred          | 1gup                | Modeller            | HADDOCK              | Symmetry + CM                |
| T79    | T0782           | HHpred          | 3rco                | Modeller            | HADDOCK              | Symmetry + CM                |
| T80    | T0786           | Hhpred + Needle | 1mdo                | Modeller            | HADDOCK (Refinement) | Symmetry + Ca-Ca (PS-HOMPPI) |
| T81    | T0797-<br>T0798 | Hhpred + Needle | 2gzd                | Modeller (Multimer) | HADDOCK (Refinement) | Symmetry                     |
| T82    | T0801           | HHpred          | 3eo8 / 4dn2         | Modeller (Multimer) | HADDOCK (Refinement) | Symmetry                     |
| T84    | T0811           | HHpred          | 1b9b                | Modeller (Multimer) | HADDOCK (Refinement) | Symmetry                     |
| T85    | T0813           | HHpred          | 3ggg                | Modeller (Multimer) | HADDOCK (Refinement) | Symmetry                     |
| T86    | T0815           | HHpred          | 4mjd                | Modeller            | HADDOCK              | Symmetry + CM                |
| T87    | T0819           | HHpred          | 3get                | Modeller (Multimer) | HADDOCK (Refinement) | Symmetry + Ca-Ca (PS-HOMPPI) |
| T88    | T0825           | HHpred + Needle | 2ymu                | As above. Mutated   | HADDOCK              | Symmetry + CM                |
| T89    | T0840           |                 |                     |                     |                      |                              |
|        | T0841           | HHpred + Needle | 1shy / 4fww         | Modeller            | HADDOCK              | Symmetry + CM                |
| T90    | T0843           | HHpred          | 4cl3                | Modeller (Multimer) | HADDOCK (Refinement) | Symmetry                     |
| T91    | T0847           | HHpred          | 1bry                | Modeller/I-Tasser   | HADDOCK              | Symmetry + Ca-Ca (PS-HOMPPI) |
| T92    | T0849           | Delta-Blast     | 1lbk                | Modeller (Multimer) | HADDOCK (Refinement) | Symmetry                     |
| T93    | T0851           | HHpred          | 2y0c                | Modeller (Multimer) | HADDOCK (Refinement) | Symmetry                     |
| T94    | T0852           | HHpred          | 3gff                | Modeller (Multimer) | HADDOCK (Refinement) | Symmetry                     |

**Table S2.**

For each target, i-RMSD, l-RMSD and Fnat values are reported for the best model submitted by HADDOCK and the best model of the remaining of the CAPRI community. Cases for which HADDOCK submitted the best model in terms of i-RMSD, l-RMSD or fnat are highlighted in bold.

| Target | HADDOCK     |             |             | CAPRI community |        |      |
|--------|-------------|-------------|-------------|-----------------|--------|------|
|        | i-RMSD      | l-RMSD      | fnat        | i-RMSD          | l-RMSD | fnat |
| T69.1  | 2,78        | 2,40        | 0,62        | 2,47            | 2,18   | 0,65 |
| T70.2  | 1,29        | <b>3,19</b> | 0,64        | 1,20            | 4,51   | 0,75 |
| T71.1  | 4,82        | 19,88       | 0,13        | 3,12            | 14,29  | 0,30 |
| T71.3  | 3,33        | 8,82        | 0,33        | 2,30            | 7,55   | 0,63 |
| T72.1  | 5,19        | 8,55        | <b>0,63</b> | 4,27            | 7,29   | 0,47 |
| T73.1  | 6,55        | 16,99       | 0,26        | 4,75            | 14,33  | 0,29 |
| T73.2  | 5,52        | 14,45       | <b>0,75</b> | 4,33            | 9,79   | 0,50 |
| T75.1  | 2,28        | 4,76        | 0,49        | 1,65            | 3,48   | 0,55 |
| T79.1  | <b>2,29</b> | 4,43        | <b>0,75</b> | 2,29            | 3,84   | 0,63 |
| T79.2  | 2,36        | <b>4,12</b> | <b>0,84</b> | 2,12            | 4,16   | 0,80 |
| T79.3  | 10,64       | 21,29       | 0,07        | 4,66            | 8,24   | 0,26 |
| T80.1  | 1,57        | 2,68        | 0,76        | 1,20            | 1,49   | 0,81 |
| T81.1  | 3,01        | 7,42        | 0,31        | 1,60            | 2,72   | 0,79 |
| T82.1  | 2,18        | 2,61        | 0,60        | 2,03            | 2,45   | 0,73 |
| T84.1  | 1,37        | 3,09        | <b>0,87</b> | 1,21            | 2,16   | 0,86 |
| T85.1  | 1,96        | 3,30        | 0,75        | 1,21            | 1,52   | 0,79 |
| T86.1  | 5,60        | 18,03       | <b>0,57</b> | 2,59            | 5,28   | 0,57 |
| T86.2  | 7,11        | 22,22       | 0,16        | 1,04            | 4,71   | 1,00 |
| T87.1  | 2,44        | 2,68        | 0,63        | 1,87            | 2,40   | 0,65 |
| T89.1  | 1,97        | 4,89        | 0,68        | 1,28            | 4,66   | 0,79 |
| T90.1  | 2,35        | 4,41        | 0,61        | 2,01            | 2,59   | 0,75 |
| T91.1  | 1,59        | 4,54        | 0,70        | 1,46            | 3,40   | 0,80 |
| T92.1  | 2,85        | 3,39        | 0,50        | 2,58            | 3,08   | 0,52 |
| T93.1  | 2,02        | 3,52        | 0,56        | 1,50            | 2,10   | 0,74 |
| T94.1  | 3,69        | 9,72        | 0,68        | 3,53            | 7,46   | 0,71 |

## References

1. A. Sali and T. L. Blundell. “Comparative protein modelling by satisfaction of spatial restraints”. In: *J. Mol. Biol.* 234.3 (1993),pp. 779–815.
2. A. Hildebrand et al. “Fast and accurate automatic structure prediction with HHpred”. In: *Proteins* 77 Suppl 9 (2009),pp. 128–132.
3. Roy, A. Kucukural, and Y. Zhang. “I-TASSER: a unified platform for automated protein structure and function prediction”. In: *Nat Protoc* 5.4 (2010), pp. 725–738.
4. H. McWilliam et al. “Analysis Tool Web Services from the EMBL-EBI”. In: *Nucleic Acids Res.* 41.Web Server issue (2013), pp. 597–600.
5. E. Karaca et al. “Building macromolecular assemblies by information-driven docking: introducing the HADDOCK multi-body docking server”. In: *Mol. Cell Proteomics* 9.8 (2010), pp. 1784–1794.
6. L. C. Xue, D. Dobbs, and V. Honavar. “HomPPI: a class of sequence homology based protein-protein interface prediction methods”. In: *BMC Bioinformatics* 12 (2011), p. 244.
